# Supplementary material for: Soil Microbial Communities in Pseudotsuga sinensis Forests with Different Degrees of Rocky Desertification in the Karst Region, Southwest China
Source: MDPI journal article supplement (doi:10.3390/f15010047), 2023-12-25
Supplement: s1 [file s1]

## Supplementary Materials

**Soil microbial communities in *Pseudotsuga sinensis* forests with different degrees of rocky desertification in the karst region, southwest China**

Wangjun Li<sup>1</sup>, Bin He<sup>1</sup>, Tu Feng<sup>1</sup>, Xiaolong Bai<sup>1</sup>, Shun Zou<sup>1</sup>, Yang Chen<sup>1</sup>, Yurong Yang<sup>2,\*</sup>, Xuefeng Wu<sup>3,\*</sup>

<sup>1</sup> *Guizhou Province Key Laboratory of Ecological Protection and Restoration of Typical Plateau Wetlands (Guizhou University of Engineering Science), Bijie 551700, China;*

<sup>2</sup> *Key Laboratory for Vegetation Ecology, Ministry of Education, State Environmental Protection Key Laboratory of Wetland Ecology and Vegetation Restoration, School of Environment, Northeast Normal University, Changchun 130117, China*

<sup>3</sup> *Chongqing Institute of Quality & Standardization, Chongqing 400000, China*

## **Method 1: DNA Extraction, pyrosequencing, and bioinformatic processing**

The total microbial genomic DNA in the soil samples was extracted from 0.5 g of frozen soil by a PowerSoil DNA extraction kit (MoBio, Carlsbad, USA) according to the manufacturer's recommendations. The final DNA concentration and purification were detected with a NanoDrop 2000 UV-vis spectrophotometer (Thermo Scientific, Wilmington, USA), and the DNA quality was evaluated by 1.5% agarose gel electrophoresis. Bacterial V3-V4 regions of the 18S rRNA gene and fungal ITS region were amplified by primers 338F/806R and ITS5-1737F/ITS2-2043R, respectively (Table S1). The purified, barcode-tagged amplicons from each cDNA library were merged into equimolar concentrations and paired-end sequenced ( $2 \times 250$ ) on an Illumina Novaseq6000 platform (Illumina, USA) by Shanghai Personal Biotechnology Co., Ltd (Shanghai, China). The Illumina sequencing raw read data deposited in the Sequence Read Archive (SRA) are available in the NCBI SRA portal with PRJNA1031341, bioproject ID. More detailed information about the PCR conditions and quality assessment is provided in Table S1.

The raw sequence data were demultiplexed using the demux plugin followed by primers cutting with the cutadapt plugin [1]. Sequences were then quality filtered, denoised, merged and chimera removed using the DADA2 plugin [2]. Non-singleton amplicon sequence variants (ASVs) were aligned with mafft [3] and used to construct a phylogeny with fasttree2 [4]. Alpha-diversity metrics (Chao1, Observed species, Shannon), and beta diversity

metrics (Bray-Curtis dissimilarity) were assessed using the diversity plugin with samples that were rarefied to 52043 sequences for bacteria and 30804 for fungi per sample. Taxonomy was assigned to ASVs using the classify-sklearn naïve Bayes taxonomy classifier in the feature-classifier plugin [5] against the Greengenes 13\_8 99% OTUs reference sequences [6].

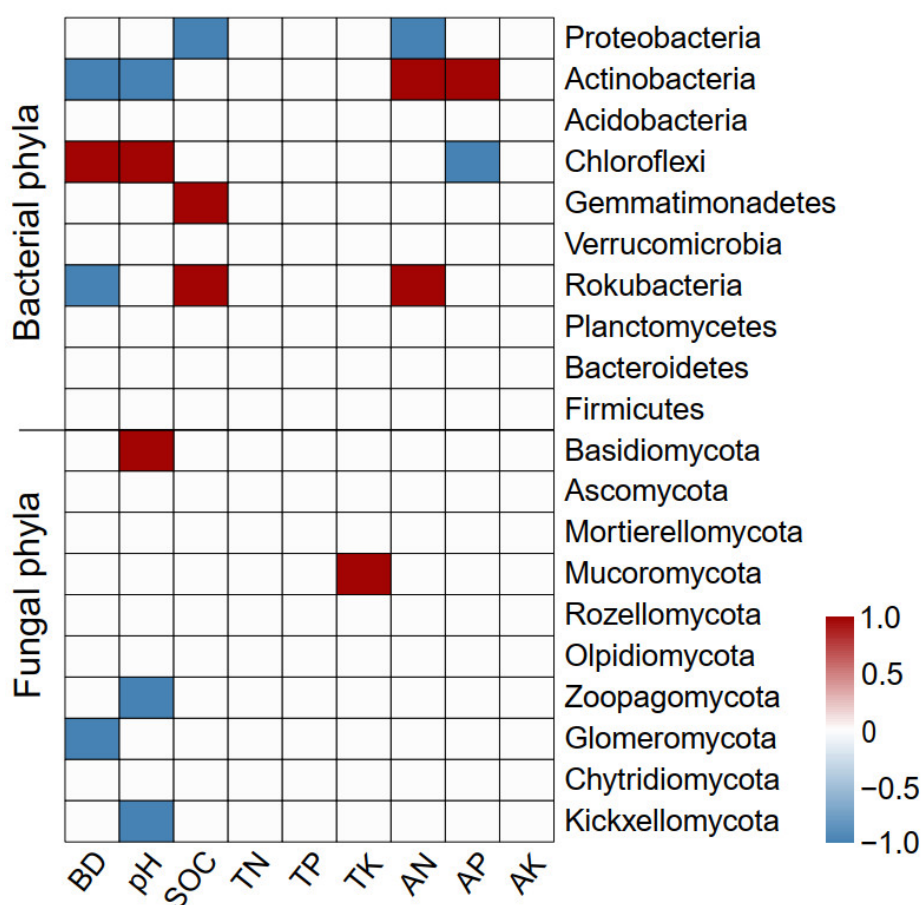

**Figure S1.** The correlations between the relative abundance of microbial phyla and soil properties. BD, bulk density; SOC, soil organic carbon; TN, total nitrogen; TP, total phosphorus; TK, total potassium; AN, available nitrogen; AP, available phosphorus; and AK, available potassium.

**Table S1.** Primer sets and thermal profiles used in PCR amplification.

| Gene                    | Primer                                                                                                                                                                                                                                                                                                                                                                                             | Sequence (5'-3')       | PCR conditions                                                                                                         |
|-------------------------|----------------------------------------------------------------------------------------------------------------------------------------------------------------------------------------------------------------------------------------------------------------------------------------------------------------------------------------------------------------------------------------------------|------------------------|------------------------------------------------------------------------------------------------------------------------|
| Bacteria<br>16S<br>rRNA | 338F                                                                                                                                                                                                                                                                                                                                                                                               | ACTCCTACGGGAGGCAGCA    | 3 min at 95°C followed by 30 cycles of 30 s at 95°C, 30 s at 55°C, 45 s at 72°C, and 10 min at 72°C for the last cycle |
|                         | 806R                                                                                                                                                                                                                                                                                                                                                                                               | GGACTACHVGGGTWTCTAAT   |                                                                                                                        |
| Fungal<br>ITS1          | ITS5-1737F                                                                                                                                                                                                                                                                                                                                                                                         | GGAAGTAAAAGTCGTAACAAGG | 2 min at 98°C followed by 30 cycles of 15 s at 98°C, 30 s at 55°C, 30 s at 72°C, and 5 min at 72°C for the last cycle  |
|                         | ITS2-2043R                                                                                                                                                                                                                                                                                                                                                                                         | GCTGCGTTCTTCATCGATGC   |                                                                                                                        |
| Reaction system         | Both PCR reactions were performed in triplicate in a total volume of 20 µL, containing 4 µL of 5 × FastPfu Buffer, 2 µL of 2.5 mM dNTPs, 0.4 µL of each primer (10 µM), 0.4 µL of FastPfu Polymerase, 1 µL of template DNA (approximately 10 ng), 0.2 µL of BSA, and 10.8 µL of dd H <sub>2</sub> O. An 8 bp sequence barcode was added as a tag to distinguish the PCR products from one another. |                        |                                                                                                                        |

## References

1. Martin, M. Cutadapt removes adapter sequences from high-throughput sequencing reads. *EMBnet J.* **2011**, *17*, 10–12.
2. Callahan, B.J.; McMurdie, P.J.; Rosen, M.J.; Han, A.W.; Johnson, A.J.A.; Holmes, S.P. DADA2: High-resolution sample inference from Illumina amplicon data. *Nat. Methods* **2016**, *13*, 581–583.
3. Katoh, K.; Misawa, K.; Kuma, K.I.; Miyata, T. MAFFT: a novel method for rapid multiple sequence alignment based on fast Fourier transform. *Nucleic Acids Res.* **2002**, *30*, 3059–3066.
4. Price, M.N.; Dehal, P.S.; Arkin, A.P. FastTree 2-approximately maximum-likelihood trees for large alignments. *PloS One* **2010**, *5*, e9490.
5. Bokulich N.A.; Kaehler B.D.; Rideout J.R.; Dillon M.; Bolyen E.; Knight R.; et al. Optimizing taxonomic classification of marker-gene amplicon sequences with QIIME 2's q2-feature-classifier plugin. *Microbiome* **2018**, *6*, 90.
6. McDonald, D.; Price, M.N.; Goodrich, J.; Nawrocki, E.P.; DeSantis, T.Z.; Probst, A.; et al. An improved Greengenes taxonomy with explicit ranks for ecological and evolutionary analyses of bacteria and archaea. *ISME J.* **2012**, *6*, 610–618.
